1 **TonB dependent uptake of  $\beta$ -lactam antibiotics in the opportunistic human pathogen**

2 ***Stenotrophomonas maltophilia*.**

3

4

5 Karina Calvopiña<sup>1</sup>, Punyawee Dulyayangkul<sup>1,2</sup>, Kate J. Heesom<sup>3</sup>, Matthew B. Avison<sup>1</sup>

6

7 <sup>1</sup>School of Cellular & Molecular Medicine, University of Bristol, Bristol. UK

8 <sup>2</sup>Program in Applied Biological Sciences: Environmental Health, Chulabhorn Graduate

9 Institute, Bangkok 10210, Thailand.

10 <sup>3</sup>University of Bristol Proteomics Facility, Bristol. UK

11

12

13

14

15

16 **Abstract**

17 The  $\beta$ -lactam antibiotic ceftazidime is one of only a handful of drugs with proven clinical  
18 efficacy against the opportunistic human pathogen *Stenotrophomonas maltophilia*. Here, we  
19 show that mutations in the energy transducer TonB, encoded by *smlt0009* in *S. maltophilia*,  
20 confer ceftazidime resistance. This breaks the dogma that  $\beta$ -lactams enter Gram-negative  
21 bacteria only by passive diffusion through outer membrane porins. By confirming cross-  
22 resistance of Smlt0009 mutants with a siderophore-conjugated lactivicin antibiotic, we reveal  
23 that attempts to improve penetration of antimicrobials into Gram negative bacteria by  
24 conjugating them with TonB substrates is likely to select  $\beta$ -lactam resistance in *S.*  
25 *maltophilia*, increasing its clinical threat. Furthermore, we show that *S. maltophilia* clinical  
26 isolates that have an Smlt0009 mutation already exist. Remarkably, therefore,  $\beta$ -lactam use  
27 is already eroding the potential utility of currently experimental siderophore-conjugated  
28 antimicrobials against this species.

29

30

31

32

33

34

35

36

37

38

## 39 Introduction

40 *Stenotrophomonas maltophilia* is an important opportunistic human pathogen and clinical  
41 isolates are resistant to almost all  $\beta$ -lactam antibiotics because of the production of two  $\beta$ -  
42 lactamases: L1, a subclass B3 metallo- $\beta$ -lactamase and L2, a class A Extended Spectrum  $\beta$ -  
43 Lactamase (Gould *et al.*, 2006). Production of L1 and L2 is co-ordinately controlled by  
44 AmpR, a LysR-type transcriptional activator and induced during  $\beta$ -lactam challenge of cells  
45 (Okazaki & Avison, 2008). Despite this, many *S. maltophilia* clinical isolates remain  
46 susceptible to the  $\beta$ -lactam ceftazidime because it is a relatively poor substrate for these two  
47 enzymes (Calvopina *et al.*, 2017). However, mutants that have acquired ceftazidime  
48 resistance can easily be identified in the laboratory, and ceftazidime resistant isolates are  
49 commonly encountered in the clinic. In many cases, these mutants hyperproduce L1 and L2  
50 (Okazaki & Avison, 2008, Talfan *et al.*, 2013, Calvopina & Avison, 2018) but we have  
51 previously identified ceftazidime resistant mutants that did not hyperproduce  $\beta$ -lactamase  
52 (Gould & Avison, 2006). It was hypothesised that these mutants might have reduced  
53 accumulation of ceftazidime (Talfan *et al.*, 2013). The primary non- $\beta$ -lactamase mediated  
54 mechanisms of  $\beta$ -lactam resistance in similar non-fermenting bacteria such as  
55 *Pseudomonas aeruginosa* are increased efflux and reduced outer membrane permeability  
56 due to a reduction in the production of outer membrane porins (Castanheira *et al.*, 2014). In  
57 Gram negative bacteria generally, tripartite outer membrane porins are considered the only  
58 site of entry for  $\beta$ -lactams, and reduced porin levels can reduced  $\beta$ -lactam susceptibility in  
59 many species (Pfeifer *et al.*, 2010). No other way of entry has previously been suggested  
60 unless the  $\beta$ -lactam is conjugated to a catechol siderophore, in which case a TonB-  
61 dependent uptake system is used (Livermore, 1987). The aim of the work reported below  
62 was to identify the mechanism of non- $\beta$ -lactamase mediated ceftazidime resistance in *S.*  
63 *maltophilia*. In so doing, we have broken the dogma that states that  $\beta$ -lactams can only enter  
64 Gram-negative bacteria through trimeric outer membrane porins via passive diffusion.

65

## 66 Results and Discussion

67 Around 50% of ceftazidime resistant mutants selected from *S. maltophilia* clinical isolate  
68 K279a do not hyperproduce  $\beta$ -lactamase (Talfan *et al.*, 2013). To identify the mechanism  
69 involved, we selected additional ceftazidime resistant mutants from K279a. Mutants  
70 expressing basal  $\beta$  lactamase activity (i.e. in the absence of  $\beta$ -lactam antibiotic) similar to  
71 K279a ( $\sim 0.02$  nmol of nitrocefin hydrolysed.min<sup>-1</sup>. $\mu$ g<sup>-1</sup> of extracted protein) were taken  
72 forward for study. Of these, mutants M1 and M52 are exemplars. They are not  $\beta$ -lactamase  
73 hyperproducers (**Table 1**) but  $\beta$  lactam susceptibility was reduced, as shown by an observed  
74 reduction in the inhibition zone diameter around various  $\beta$ -lactam discs. However, where  
75 non- $\beta$ -lactams were tested, the impact on susceptibility of the mutations was minimal  
76 (**Figure 1**).

77 Whole genome sequencing was performed to identify the mutations present in ceftazidime  
78 resistant mutants M1 and M52. Only one gene was found to be mutated in each. It was the  
79 same in both: *smlt0009*, annotated in the K279a genome sequence as encoding a 'putative  
80 proline-rich TonB energy transducer protein' (Crossman *et al.*, 2008). The mutation was  
81 confirmed using high fidelity PCR sequencing. In both M1 and M52, a proline rich region in  
82 Smlt0009 situated at around 70 amino acids into the 222 amino acid protein was shortened  
83 but there was no frameshift (**Figure 2**). Assuming this shortening impairs protein function,  
84 and to confirm the role of this impairment in ceftazidime resistance, *smlt0009* was  
85 insertionally inactivated in K279a using a suicide gene replacement methodology. K279a  
86  $\Delta$ *smlt0009* was confirmed to be ceftazidime resistant (**Table 1**).

87 To understand more about the phenotype of M1 and M52, whole envelope proteomics was  
88 performed in comparison with K279a. This confirmed that the  $\beta$  lactamases L1 and L2 are  
89 not overproduced. However, 162 proteins were identified that are significantly up or down  
90 regulated in both M1 and M52 relative to K279a; 83 are downregulated in both and 79  
91 upregulated in both (**Table S1**). Within the group of downregulated proteins, Smlt0009  
92 (Uniprot: B2FT87) itself was 1.8 fold downregulated in M1, and 2.5- fold in M52 when

93 compared with K279a (**Figure 3A**). Shortening of the Smlt0009 proline rich region in M1 and  
94 M52 is not expected to block production of the protein, but the mutated, presumably less  
95 active, protein may be less stable than wild-type explaining this downregulation. Proteomics  
96 for K279a  $\Delta$ smlt0009 (**Table S2**) confirmed total loss of Smlt0009 in this case (**Figure 3A**).  
97 Amongst proteins upregulated in M1, M52 (and in K279a  $\Delta$ smlt0009) were proteins with the  
98 Uniprot accession numbers B2FHQ4, encoded by *entB*, *smlt2820* (**Figure 3B**), B2FRE6  
99 (*fepC*, *smlt2356*) and B2FRE7 (*fepD*, *smlt2357*) (**Tables S1; S2**). These upregulated Fep  
100 proteins are involved in siderophore production in *S. maltophilia* (Nas & Cianciotto, 2017)  
101 and siderophore production was found to be increased in M1 and M52 and K279a  
102  $\Delta$ smlt0009 relative to K279a, as predicted from the proteomics (**Figure 3C**).

103 Once iron-scavenging siderophores are exported by a bacterium, iron-siderophore-complex  
104 import requires a TonB complex formed by a proline rich TonB energy transducer protein  
105 with ExbB and ExbD, which interacts with one or more ligand-gated porins (LGPs).  
106 Specificity occurs because TonB only interacts with LGPs that have bound substrate (Wilson  
107 *et al.*, 2016, Klebba, 2016). In this way, proton motive force, generated in the inner  
108 membrane, is transduced by ExbBD – Smlt0010 and Smlt0011 in *S. maltophilia* (Crossman  
109 *et al.*, 2008) – to cause rotational motion of the N-terminus of the TonB energy transducer  
110 (Smlt0009) and specific opening of any LGP that has bound ligand, ultimately driving ligand  
111 import (Klebba, 2016).

112 Ceftazidime resistant mutants M1 and M52 have mutations in this proline rich TonB energy  
113 transducer protein, Smlt0009, so TonB complex dependent import of all LGP ligands is likely  
114 to be reduced. These mutants also have upregulation of proteins involved in siderophore  
115 production (**Table S1; Figure 3B**), leading to observed enhanced siderophore production  
116 (**Figure 3C**). One hypothesis to explain this is that loss of Smlt0009 activity impedes iron  
117 siderophore-complex import, which increases siderophore production as a response to the  
118 resulting iron starvation.

119 In some bacteria, TonB complexes participate in the import of LGP-dependent ligands in  
120 addition to iron-siderophore complexes. In fact, in the environmental species *Xanthomonas*  
121 *campestris*, only 15% of LGPs are involved in iron-siderophore-complex import (Schauer *et*  
122 *al.*, 2008). *S. maltophilia* Smlt0009 shares 50% identity with the TonB energy transducer  
123 protein from the closely related species *X. campestris*. Interestingly, of 162 proteins  
124 differently regulated in M1 and M52, 19 are putative TonB-dependent LGP proteins (**Table**  
125 **S1**). Apparently, M1 and M52 are responding to a breakdown in TonB-dependent energy  
126 transduction associated with the import of many diverse ligands.

127 In terms of ceftazidime resistance in M1 and M52, we hypothesise that in *S. maltophilia*,  $\beta$   
128 lactams are TonB dependent substrates. Thus, mutations in the proline rich region of  
129 Smlt0009 reduce energy dependent-ceftazidime import. This is the first time that  $\beta$  lactam  
130 entry via a TonB dependent mechanism has been proposed in any bacterium. However, it is  
131 interesting to note that, unlike all other pathogens studied previously, outer membrane  
132 passive diffusion porin loss has never been seen to be involved in  $\beta$ -lactam resistance in *S.*  
133 *maltophilia* (Sanchez, 2015) which supports the existence of a novel import mechanism in  
134 this species.

135 To test our hypothesis that reduction of Smlt0009 activity reduces ceftazidime import in *S.*  
136 *maltophilia*, we tested envelope permeability to a DNA-intercalating Hoescht dye in the  
137 presence of ceftazidime. In K279a, permeability to the dye (and so the rate of increase in  
138 cellular fluorescence following binding of the dye to DNA) reduced in the presence of  
139 ceftazidime, which means both antibiotic and dye are competing for the same general  
140 uptake system(s) (**Figure 4A**). This reduction in permeability is not caused by cell death  
141 because the concentration of ceftazidime chosen does not significantly impact on cell growth  
142 during mid-exponential phase where cells are harvested to test permeability (**Figure 4B**).  
143 Smlt0009 mutant M1, chosen as an exemplar, is less permeable to the dye than K279a,  
144 presumably because entry of the dye is at least in part TonB dependent, but most  
145 importantly, in M1, ceftazidime no longer competes with the dye for entry to the cell (**Figure**

146 **4B**). Therefore, we conclude that Smlt0009 mutation reduces ceftazidime uptake, and that  
147 this is the mechanism of ceftazidime resistance.

148 Siderophore-conjugation has been used as a way of increasing the penetration of  
149 cephalosporins and monobactams into Gram-negative bacteria by hijacking the TonB  
150 dependent uptake system (Kline *et al.*, 2000, Choi & McCarthy, 2018). Indeed, recently we  
151 have shown that siderophore conjugation of the  $\gamma$ -lactam antibiotic lactivicin (to create LTV-  
152 17) dramatically improves potency against *S. maltophilia* (Calvopina *et al.*, 2016). As  
153 expected given TonB dependence of LTV-17 uptake (Starr *et al.*, 2014), ceftazidime  
154 resistant Smlt0009 mutants M1 and M52 also have reduced susceptibility to LTV-17, as  
155 does K279a  $\Delta$ smlt0009 where in each case the MIC increased to  $\geq 0.25 \mu\text{g.mL}^{-1}$  (**Table 1**). A  
156 single-step mutant (KLTV) with reduced susceptibility to LTV-17 was next selected from  
157 K279a and we found that the mutant is also resistant to ceftazidime (**Table 1**). KLTV whole  
158 envelope proteomics showed very similar changes to those observed in M1 and M52 (**Table**  
159 **S3**). Specifically, in KLTV, like M1 and M52, there is downregulation of Smlt0009 and  
160 upregulation of the EntB siderophore biosynthesis enzyme and siderophore overproduction  
161 (**Figure 3**). WGS confirmed shortening of the proline-rich region in Smlt0009 in KLTV  
162 (**Figure 2**). TonB mutations are known to increase susceptibility to siderophore conjugated  
163 antimicrobials but have never previously been reported to affect  $\beta$ -lactam susceptibility  
164 (Hassett *et al.*, 1996, Tomaras *et al.*, 2013, Moynie *et al.*, 2017). Importantly, *S. maltophilia*  
165 Smlt0009 mutants do not have reduced susceptibility to the non-siderophore conjugated  
166 parent lactivicin, LTV-13 (**Table 1**), even though this  $\gamma$ -lactam is structurally related to the  $\beta$ -  
167 lactams (Starr *et al.*, 2014). This shows that TonB-dependent uptake of  $\beta$ -lactams is specific  
168 and there is minimal affinity for  $\gamma$ -lactams.

169 Finally, we turned to our world-wide collection of 22-phylogenetic group A *S. maltophilia*  
170 clinical isolates (Gould *et al.*, 2006) against which we measured the MICs of LTV-17 and  
171 LTV-13 (**Table 2**). One isolate, number 31, stood out as having reduced susceptibility to  
172 LTV-17 (MIC =  $0.25 \mu\text{g.mL}^{-1}$ ) without altered susceptibility to LTV-13, a phenotype shared

173 with K279a Smlt0009 mutants (**Tables 1, 2**). Of the tested clinical isolates had the same  
174 predicted sequence for Smlt0009 as K279a, based on PCR sequencing; eight isolates had  
175 N169S plus A209T variants of this sequence, but given it is so common this is highly likely to  
176 be random genetic drift. Isolate number 31, with reduced LTV-17 susceptibility had an  
177 insertion of a single proline in the proline-rich region of Smlt0009 (**Table 2**).

178 According to our records, isolate number 31 was from a patient being treated in an intensive  
179 care unit in a Brazilian hospital in 2003. It was collected as part of the SENTRY antimicrobial  
180 surveillance programme (Toleman *et al.*, 2007). Whilst siderophore-conjugated  
181 antimicrobials have been in experimental use since the 1980s there is no reason to believe  
182 that this isolate has ever been exposed to such a compound. We must conclude, therefore  
183 that this mutation has been selected by  $\beta$ -lactam use. Remarkably, however, isolate number  
184 31 carries an *ampD* loss of function mutation and hyper-produces both the L1 and L2  $\beta$ -  
185 lactamases, which is enough to give pan  $\beta$ -lactam resistance without any additional  
186 mechanism (Gould *et al.*, 2006, Talfan *et al.*, 2013, Calvopina *et al.*, 2017). It is possible,  
187 however, that some combination of  $\beta$ -lactams would still be effective against a  $\beta$ -lactamase  
188 hyper-producer, and the use of such a combination might select for this additional  $\beta$ -lactam  
189 resistance mechanism. And certainly, isolate number 31 is unusual in its resistance to  
190 ceftazidime/ $\beta$ -lactamase inhibitor combinations (Calvopina *et al.*, 2017), so combination  
191 therapy including a  $\beta$ -lactam/ $\beta$ -lactamase inhibitor might have selected for this mutation  
192 even in a background of  $\beta$ -lactamase hyper-producer. Whatever the specifics of selection in  
193 this case, we have demonstrated the existence of *S. maltophilia* clinical isolates with  
194 mutations in the TonB energy transducer which have reduced susceptibility to  $\beta$ -lactams and  
195 siderophore-conjugated antimicrobials. Uncovering this unforeseen cross-resistance  
196 phenotype may well suggest a reassessment of the use of  $\beta$ -lactams, alone or in  
197 combination with other agents, for the treatment of *S. maltophilia* infections unless there is  
198 no alternative for fear of eroding the future potential of siderophore-conjugated antimicrobials  
199 as agents to treat infections caused by this species.



## 200 **Experimental**

### 201 *Bacterial isolates and materials*

202 *S. maltophilia* clinical isolates used originated from the SENTRY antimicrobial resistance  
203 survey and have been previously described (Toleman *et al.*, 2007) plus isolate K279a  
204 (Avison *et al.*, 2000). All growth media were from Oxoid. Chemicals were from Sigma, unless  
205 otherwise stated. LTV-13 was re synthesized according to the literature protocol and kindly  
206 provided by Prof. C. Schofield, University of Oxford (Starr *et al.*, 2014). LTV-17 was kindly  
207 supplied by Pfizer.

### 208 *Selection of resistant mutants*

209 K279a ceftazidime resistant mutants were selected after exposure of lawns of bacteria to 30  
210 µg ceftazidime discs on Muller-Hinton Agar (MHA) by picking the colonies within the zone of  
211 inhibition after using a bacterial suspension that was 100-fold higher than the recommended  
212 value according to the CLSI guidelines (CLSI, 2012). Mutants with reduced susceptibility to  
213 LTV-17 were selected by plating 100 µL of an overnight culture grown in Nutrient Broth (NB)  
214 on MHA containing increasing concentrations of LTV-17. Colonies from the highest LTV-17  
215 concentration plate where growth was seen were picked.

### 216 *Siderophore Detection*

217 100 µL of an overnight culture in Cation-Adjusted Muller-Hinton Broth (CA-MHB) was used  
218 to set up a fresh subculture in 10 mL of CA-MHB which was then incubated until the OD<sub>600</sub>  
219 reached 0.5. Cells were centrifuged (4,000 x *g*, 10 min) and the resulting pellet was  
220 resuspended in 10 mL of Phosphate Buffered Saline (PBS) and centrifuged again (4,000 x *g*,  
221 10 min). The supernatant was discarded, and the pellet was again resuspended in fresh  
222 PBS (10 mL) and centrifuged (4,000 x *g*, 10 min). This washed bacterial pellet was then  
223 diluted in PBS to prepare a bacterial suspension of OD<sub>600</sub> 0.2. Ten microliters of the bacterial  
224 suspension were spotted on Chrome Azurol S (CAS) agar. CAS agar was made up mixing  
225 up 90 mL of MHA and 10 mL of freshly made CAS solution. 100 mL of the CAS solution was

226 made up based on the following description: 60.5 mg of CAS in 50 mL of water, 72.9 mg of  
227 hexadecyltrimethyl ammonium bromide in 40 mL of water, and 10 mL of 1 mM FeCl<sub>3</sub>, 10 mM  
228 HCl) (Garcia *et al.*, 2012). CAS agar control included 100 µM FeCl<sub>3</sub> where no colour change  
229 was expected.

### 230 *Determining minimal inhibitory concentrations (MICs) of antimicrobials and disc susceptibility* 231 *testing*

232 The CLSI protocol was followed for disc susceptibility testing (CLSI, 2006). The clearance  
233 zone was measured after 20 h of incubation and bacteria reported as susceptible or resistant  
234 according to CLSI published breakpoints, where available (CLSI, 2017).

235 MICs were determined using CLSI broth microtitre assays (CLSI, 2012) and interpreted  
236 using published breakpoints (CLSI, 2017). Briefly, a PBS bacterial suspension was prepared  
237 to obtain a stock of OD<sub>600</sub>=0.01. The final volume in each well of a 96-well cell culture plate  
238 (Corning Costar) was 200 µL and included 20 µL of the bacterial suspension. Bacterial  
239 growth was determined after 20 h of incubation by measuring OD<sub>600</sub> values using a  
240 POLARstar Omega spectrophotometer (BMG Labtech).

### 241 *β-lactamase assays*

242 100 µL of an overnight NB culture was diluted in 10 mL of NB and incubated at 37°C with  
243 shaking until OD<sub>600</sub> was 0.4. Cells were pelleted by centrifugation (4,000 x *g*, 10 min) and  
244 pellets resuspended in 100 µL of BugBuster (Ambion). Pellets were transferred to 1.5 mL  
245 microtube (Eppendorf) before rocking at 70 rpm for 30 min at room temperature. Cell debris  
246 and unlysed cells were pelleted by centrifugation (13,000 x *g*, 5 min) and the supernatant  
247 retained as a source of crude cell protein. Protein concentrations in cell extracts were  
248 determined using the BioRad protein assay dye reagent concentrate according to the  
249 manufacturer's instructions. β-Lactamase activity in crude cell extracts was determined  
250 using a POLARstar Omega plate spectrophotometer (BMG Labtech). Nitrocefin (40 µM)  
251 solution was used as a substrate, prepared in 0.2 µm syringe-filtered assay buffer (60 mM

252  $\text{Na}_2\text{HPO}_4 \cdot 7\text{H}_2\text{O}$  pH 7.0, 40 mM  $\text{NaH}_2\text{PO}_4 \cdot \text{H}_2\text{O}$ , 10 mM KCl, 1 mM  $\text{MgSO}_4 \cdot 7\text{H}_2\text{O}$ , 100  $\mu\text{M}$   
253  $\text{ZnCl}_2$ ). Nitrocefin hydrolysis assays were performed in Corning Costar 96-well flat-bottomed  
254 cell culture plates with a combination of 1  $\mu\text{L}$  of cell extract and 179  $\mu\text{L}$  of nitrocefin solution.  
255 Product accumulation was measured at 482 nm for 5 min or until the end of the linear phase  
256 of the reaction. Final  $\beta$ -lactamase activity ( $\text{nmol} \cdot \text{min}^{-1} \cdot \mu\text{g}^{-1}$  of protein in cell extract) was  
257 calculated via change in absorbance per minute taken from the linear phase of the reaction  
258 in Omega Data Analysis. An extinction coefficient of  $17400 \text{ M}^{-1}\text{cm}^{-1}$  was used for nitrocefin.  
259 The path length for liquid in a well in the 96-well plate was set at 0.56 cm.

#### 260 *Fluorescent Hoescht (H) 33342 dye accumulation assay*

261 Envelope permeability in living bacteria was tested using a standard dye accumulation assay  
262 protocol (Coldham *et al.*, 2010) where the dye only fluoresces if it crosses the entire  
263 envelope and interacts with DNA. Overnight cultures (in NB) at  $37^\circ\text{C}$  were used to prepare  
264 NB subcultures, which were incubated at  $37^\circ\text{C}$  until a 0.6  $\text{OD}_{600}$  was reached. Cells were  
265 pelleted by centrifugation (4000 rpm, 10 min) (ALC, PK121R) and resuspended in 500 $\mu\text{L}$  of  
266 PBS. The optical densities of all suspensions were adjusted to 0.1  $\text{OD}_{600}$ . Aliquots of 180  $\mu\text{L}$   
267 of cell suspension were transferred to a black flat-bottomed 96-well plate (Greiner Bio-one,  
268 Stonehouse, UK). Eight technical replicates, for each strain tested, were in each column of  
269 the plate. The plate was transferred to a POLARstar spectrophotometer (BMG Labtech) and  
270 incubated at  $37^\circ\text{C}$ . Hoescht dye (H33342, 250  $\mu\text{M}$  in water) was added to bacterial  
271 suspension of the plate using the plate-reader's auto-injector to give a final concentration of  
272 25  $\mu\text{M}$  per well. Excitation and emission filters were set at 355 nm and 460 nm respectively.  
273 Readings were taken in intervals (cycles) separated by 150 s. 31 cycles were run in total. A  
274 gain multiplier of 1300 was used. Results were expressed as absolute values of  
275 fluorescence versus time.

#### 276 *Proteomics*

277 500  $\mu$ L of an overnight NB culture were transferred to 50 mL NB and cells were grown at  
278 37°C to 0.6 OD<sub>600</sub>. Cells were pelleted by centrifugation (10 min, 4,000  $\times$  g, 4°C) and  
279 resuspended in 20 mL of 30 mM Tris-HCl, pH 8 and broken by sonication using a cycle of 1  
280 s on, 0.5 s off for 3 min at amplitude of 63% using a Sonics Vibracell VC-505TM (Sonics and  
281 Materials Inc., Newton, Connecticut, USA). The sonicated samples were centrifuged at  
282 8,000 rpm (Sorval RC5B PLUS using an SS-34 rotor) for 15 min at 4°C to pellet intact cells  
283 and large cell debris; For envelope preparations, the supernatant was subjected to  
284 centrifugation at 20,000 rpm for 60 min at 4°C using the above rotor to pellet total envelopes.  
285 To isolate total envelope proteins, this total envelope pellet was solubilised using 200  $\mu$ L of  
286 30 mM Tris-HCl pH 8 containing 0.5% (w/v) SDS.

287 Protein concentrations in all samples were quantified using Biorad Protein Assay Dye  
288 Reagent Concentrate according to the manufacturer's instructions. Proteins (5  $\mu$ g/lane for  
289 envelope protein analysis) were separated by SDS-PAGE using 11% acrylamide, 0.5% bis-  
290 acrylamide (Biorad) gels and a Biorad Min-Protein Tetracell chamber model 3000X1. Gels  
291 were resolved at 200 V until the dye front had moved approximately 1 cm into the separating  
292 gel. Proteins in all gels were stained with Instant Blue (Expedeon) for 20 min and de-stained  
293 in water.

294 The 1 cm of gel lane was subjected to in-gel tryptic digestion using a DigestPro automated  
295 digestion unit (Intavis Ltd). The resulting peptides from each gel fragment were fractionated  
296 separately using an Ultimate 3000 nanoHPLC system in line with an LTQ-Orbitrap Velos  
297 mass spectrometer (Thermo Scientific). In brief, peptides in 1% (v/v) formic acid were  
298 injected onto an Acclaim PepMap C18 nano-trap column (Thermo Scientific). After washing  
299 with 0.5% (v/v) acetonitrile plus 0.1% (v/v) formic acid, peptides were resolved on a 250 mm  
300  $\times$  75  $\mu$ m Acclaim PepMap C18 reverse phase analytical column (Thermo Scientific) over a  
301 150 min organic gradient, using 7 gradient segments (1-6% solvent B over 1 min, 6-15% B  
302 over 58 min, 15-32% B over 58 min, 32-40% B over 5 min, 40-90% B over 1 min, held at  
303 90% B for 6 min and then reduced to 1% B over 1 min) with a flow rate of 300 nL/min.

304 Solvent A was 0.1% formic acid and Solvent B was aqueous 80% acetonitrile in 0.1% formic  
305 acid. Peptides were ionized by nano-electrospray ionization MS at 2.1 kV using a stainless-  
306 steel emitter with an internal diameter of 30  $\mu\text{m}$  (Thermo Scientific) and a capillary  
307 temperature of 250°C. Tandem mass spectra were acquired using an LTQ-Orbitrap Velos  
308 mass spectrometer controlled by Xcalibur 2.1 software (Thermo Scientific) and operated in  
309 data-dependent acquisition mode. The Orbitrap was set to analyze the survey scans at  
310 60,000 resolution (at  $m/z$  400) in the mass range  $m/z$  300 to 2000 and the top twenty  
311 multiply charged ions in each duty cycle selected for MS/MS in the LTQ linear ion trap.  
312 Charge state filtering, where unassigned precursor ions were not selected for fragmentation,  
313 and dynamic exclusion (repeat count, 1; repeat duration, 30 s; exclusion list size, 500) were  
314 used. Fragmentation conditions in the LTQ were as follows: normalized collision energy,  
315 40%; activation  $q$ , 0.25; activation time 10 ms; and minimum ion selection intensity, 500  
316 counts.

317 The raw data files were processed and quantified using Proteome Discoverer software v1.4  
318 (Thermo Scientific) and searched against the UniProt *S. maltophilia* strain K279a database  
319 (4365 protein entries; UniProt accession UP000008840) using the SEQUEST (Ver. 28 Rev.  
320 13) algorithm. Peptide precursor mass tolerance was set at 10 ppm, and MS/MS tolerance  
321 was set at 0.8 Da. Search criteria included carbamidomethylation of cysteine (+57.0214) as  
322 a fixed modification and oxidation of methionine (+15.9949) as a variable modification.  
323 Searches were performed with full tryptic digestion and a maximum of 1 missed cleavage  
324 was allowed. The reverse database search option was enabled and all peptide data was  
325 filtered to satisfy false discovery rate (FDR) of 5 %. The Proteome Discoverer software  
326 generates a reverse “decoy” database from the same protein database used for the analysis  
327 and any peptides passing the initial filtering parameters that were derived from this decoy  
328 database are defined as false positive identifications. The minimum cross-correlation factor  
329 filter was readjusted for each individual charge state separately to optimally meet the  
330 predetermined target FDR of 5 % based on the number of random false positive matches

331 from the reverse decoy database. Thus, each data set has its own passing parameters.  
332 Protein abundance measurements were calculated from peptide peak areas using the Top 3  
333 method (Silva *et al.*, 2006) and proteins with fewer than three peptides identified were  
334 excluded. The proteomic analysis was repeated three times for each parent and mutant  
335 strain, each using a separate batch of cells. Data analysis was as follows: all raw protein  
336 abundance data were uploaded into Microsoft Excel. Raw data from each sample were  
337 normalised by division by the average abundance of all 30S and 50S ribosomal protein in  
338 that sample. A one-tailed, unpaired T-Test was used to calculate the significance of any  
339 difference in normalised protein abundance data in the three sets of data from the parent  
340 strains versus the three sets of data from the mutant derivative. A p-value of <0.05 was  
341 considered significant. The fold change in abundance for each protein in the mutant  
342 compared to its parent was calculated using the averages of normalised protein abundance  
343 data for the three biological replicates for each strain.

#### 344 *Whole genome sequencing to Identify mutations*

345 Whole genome resequencing was performed by MicrobesNG (Birmingham, UK) on a HiSeq  
346 2500 instrument (Illumina, San Diego, CA, USA). Reads were trimmed using Trimmomatic  
347 (Bolger *et al.*, 2014) and assembled into contigs using SPAdes 3.10.1  
348 (<http://cab.spbu.ru/software/spades/>). Assembled contigs were mapped to reference genome  
349 for *S. maltophilia* K279a (Crossman *et al.*, 2008) obtained from GenBank (accession number  
350 NC\_010943) using progressive Mauve alignment software (Darling *et al.*, 2010).

351 Mutations were checked by PCR using Phusion High Fidelity DNA Polymerase (New  
352 England Biolabs). To generate template DNA, a bacterial colony was resuspended in 100  $\mu$ L  
353 of molecular biology grade water and heated at 100°C for 5 min. The sample was  
354 centrifuged at 13000 rpm for 5 min. PCR reactions were set up using 5  $\mu$ L of 5X Phusion GC  
355 Buffer, 0.5  $\mu$ L of dNTPs (10 mM), 1.25  $\mu$ L of forward primer (10  $\mu$ M), 1.25  $\mu$ L of reverse  
356 primer (10  $\mu$ M), 0.75  $\mu$ L of DMSO, 0.25  $\mu$ L of Phusion DNA Polymerase, 1  $\mu$ L of DNA  
357 template, and 15  $\mu$ L of molecular biology grade water. The cycling conditions were the

358 following: 1 cycle of 98°C for 30 s, 30 cycles of: 98°C for 10 s, 62°C for 30 s, and 72°C for 30  
359 s, 1 cycle of 72°C for 10 min for final extension.

360 The primers used were: *smlt0009* F 5'-GTGTGAAGAACCAGGCTGATGCCA-3' and  
361 *smlt0009* R 5'-AGGGTGTAGCTAAGCTAAACAAT-3'. PCR products were purified using the  
362 QIAquick PCR Purification Kit (Qiagen) according to the manufacturer's instructions. DNA  
363 concentration of purified samples was quantified using NanoDrop Lite spectrophotometer  
364 (Thermo Scientific). PCR products were sequenced by Eurofins. Sequences obtained were  
365 analysed with ClustalW OMEGA or MultiAlignPro. Alignments were represented using  
366 ESPript 3.0.

### 367 *Insertional inactivation of smlt0009*

368 The K279a  $\Delta$ *smlt0009* mutant was constructed by gene inactivation mediated by the  
369 pKNOCK suicide plasmid (Alexeyev, 1999). The *smlt0009* DNA fragment was amplified with  
370 Phusion High-Fidelity DNA Polymerase (NEB, UK) from *S. maltophilia* genomic DNA by  
371 using primers *smlt0009* KO FW (5'-GTGAAGAATCTGTCCGCGC-3') and *smlt0009* KO RV  
372 (5'-GGATCACTTCGCCCTGGATA-3'). The PCR product was ligated into the pKNOCK-GM  
373 at SmaI site. The recombinant plasmid was then transferred into wild-type *S. maltophilia*  
374 cells by conjugation. The mutant was selected for gentamicin resistance and the mutation  
375 was confirmed by PCR using primers *smlt0009* full length FW (5'-  
376 AAAGAATTCAGTAGGAATAACGCCTGAATGC-3') and *smlt0009* full length RV (5'-  
377 AAAGAATTCTGACGCTTACCTTTGTTGTGTG-3').

378

### 379 **Acknowledgments**

380 This work was funded by grant MR/N013646/1 to M.B.A. and K.J.H and grant  
381 MR/S004769/1 to M.B.A. from the Antimicrobial Resistance Cross Council Initiative  
382 supported by the seven United Kingdom research councils and the National Institute for  
383 Health Research. Genome sequencing was provided by MicrobesNG

384 (<http://www.microbesng.uk/>), which is supported by the BBSRC (grant number  
385 BB/L024209/1). K.C. received a postgraduate scholarship from SENESCYT, Ecuador. P. D.  
386 received a scholarship from the Thai Royal Golden Jubilee Ph.D. Programme (Grant NO:  
387 PHD/0036/2558).

388

389

390

391



392 **Tables**

393

394 **Table 1. Comparison of MICs (mg.L<sup>-1</sup>) of ceftazidime and lactivicin derivatives against**  
395 ***S. maltophilia* ceftazidime and lactivicin mutants and the levels of  $\beta$ -lactamase**  
396 **produced.**

397

| Strain                         | Mean $\beta$ -lactamase activity $\pm$ SEM | MIC of Ceftazidime | MIC of LTV-13 | MIC of LTV-17 |
|--------------------------------|--------------------------------------------|--------------------|---------------|---------------|
| K279a                          | 0.02 $\pm$ 0.004                           | 4                  | 64            | 0.03          |
| M1                             | 0.02 $\pm$ 0.002                           | 256                | 128           | 0.5           |
| M52                            | 0.04 $\pm$ 0.013                           | 256                | 128           | 0.5           |
| KLTV                           | 0.05 $\pm$ 0.005                           | 256                | 64            | 0.25          |
| K279a $\Delta$ <i>smlt0009</i> | 0.01 $\pm$ 0.002                           | 128                | 128           | 0.5           |

398  $\beta$ -Lactamase activity was determined using nitrocefin hydrolysis (nmol.min<sup>-1</sup>. $\mu$ g<sup>-1</sup>) in cell  
399 extracts from bacteria grown in the absence of antibiotic.

400 Shaded values represent a more than two doubling reduced susceptibility in reference to  
401 K279a and in the case of ceftazidime, shading show clinical resistance according to CLSI  
402 breakpoints.

403

404

405 **Table 2. MICs (mg.L<sup>-1</sup>) of lactivicin derivatives against *S. maltophilia* clinical isolates**  
 406 **with different Smlt0009 sequences**

| Isolate | Smlt0009 sequence<br>(as compared with K279a) | LTV-13 MIC | LTV-17 MIC |
|---------|-----------------------------------------------|------------|------------|
| K279a   | Wild-type (by definition)                     | 64         | 0.03       |
| 10      | N169S, A209T                                  | 128        | 0.03       |
| 12      | Wild-type                                     | 64         | 0.03       |
| 14      | Wild-type                                     | 64         | 0.03       |
| 16      | Wild-type                                     | 64         | 0.03       |
| 17      | Wild-type                                     | 64         | 0.03       |
| 19      | Wild-type                                     | 128        | 0.06       |
| 21      | Wild-type                                     | 64         | 0.03       |
| 22      | Wild-type                                     | 128        | 0.03       |
| 23      | N169S, A209T                                  | 256        | 0.03       |
| 26      | N169S, A209T                                  | 64         | 0.03       |
| 27      | N169S, A209T                                  | 128        | 0.06       |
| 28      | Wild-type                                     | 64         | 0.03       |
| 29      | Wild-type                                     | 64         | 0.03       |
| 30      | N169S, A209T                                  | 128        | 0.03       |
| 31      | Insertion of Proline between<br>P69 and P70   | 128        | 0.25       |
| 32      | N169S, A209T                                  | 128        | 0.13       |
| 35      | N169S, A209T                                  | 64         | 0.06       |
| 36      | Wild-type                                     | 64         | 0.03       |
| 37      | Wild-type                                     | 64         | 0.06       |
| 39      | Wild-type                                     | 128        | 0.03       |
| 40      | N169S, A209T                                  | 64         | 0.03       |
| 43      | Wild-type                                     | 128        | 0.06       |

407

408

409

410 **Figure Legends**

411

412 **Figure 1. Antibiotic susceptibilities of ceftazidime resistant mutants versus K279a.**

413 Growth inhibition zone diameters (mm) of ceftazidime resistant mutants (M1 and M52) in  
414 comparison with the parental strain (K279a). Smaller zone diameters mean reduced  
415 susceptibility. The following antibiotics were tested: (A)  $\beta$ -lactams; ceftazidime (CAZ 30  $\mu$ g),  
416 ceftazidime (CAZ 30  $\mu$ g), cefepime (FEP 30  $\mu$ g), ticarcillin-clavulanate (TIM 85  $\mu$ g),  
417 piperacillin-tazobactam (TZP 110  $\mu$ g), doripenem (DOR 10  $\mu$ g), meropenem (MEM 10  $\mu$ g).  
418 (B) non- $\beta$ -lactams; amikacin (AK 30  $\mu$ g), gentamicin (CN 10  $\mu$ g), ofloxacin (OFX 5  $\mu$ g),  
419 ciprofloxacin (CIP 5  $\mu$ g), norfloxacin (NOR 10  $\mu$ g), tigecycline (TGC 15  $\mu$ g), minocycline (MH  
420 30  $\mu$ g), trimethoprim-sulfamethoxazole (SXT 25  $\mu$ g), chloramphenicol (C 30  $\mu$ g). Zones of  
421 inhibition are reported as mean values, n=3. Error bars represent standard error of the mean  
422 (SEM). Zone diameters are measured across the disc, so the minimum zone diameter is 6  
423 mm, which is the diameter of the disc.

424

425 **Figure 2. Sequence alignment of Smlt0009 putative proline-rich TonB energy**  
426 **transducer protein in ceftazidime resistant mutants versus K279a.**

427 Alignment of translated high fidelity PCR sequences that confirmed mutation in the proline-  
428 rich region in M1, M52 and KLTV. Key residues present in *E.coli* TonB (Kohler *et al.*, 2010)  
429 as compared with Smlt0009 that dictate periplasmic spanning distance are highlighted: blue  
430 bar corresponds to 2.9nm, the green bar to 4nm, pink bar 4.6nm and purple bar 3.3nm.  
431 Alignment was performed with CLUSTAL Omega and GeneDoc.

432

433

434 **Figure 3. Abundance of key proteins and siderophore production in ceftazidime**  
435 **resistant mutants versus K279a.**

436 Protein abundance data for **(A)** the TonB energy transducer protein Smlt0009 (Uniprot:  
437 B2FT87) and **(B)** EntB (Uniprot: B2FH84) were each normalised using the average  
438 abundance of 30S and 50S ribosomal proteins in each sample. Values are reported as mean  
439 +/- Standard Error of the Mean ( $n=3$ ). In each case the change relative to K279a in each  
440 mutant is statistically significant ( $p<0.05$ ). Full Proteomics data are shown **Tables S1, S2**  
441 **and S3.** **(C)** Siderophore production assay. Diameter values show diffusion of siderophore  
442 after spotting 10  $\mu\text{L}$  of a PBS washed bacterial suspension ( $\text{OD}_{600}$  0.2) onto a modified CAS  
443 agar. Values are reported as mean of three biological repeats; the images are representative  
444 of these three experiments.

445

446 **Figure 4 Fluorescent dye accumulation over time in ceftazidime resistant mutant M1**  
447 **versus K279a in the presence and absence of ceftazidime.**

448 **(A)** Rate of fluorescent dye accumulation in K279a (control - red) is reduced in the presence  
449 of 1  $\mu\text{g.mL}^{-1}$  ceftazidime (CAZ1 - pink). Rate of fluorescent dye accumulation in M1 in the  
450 absence of ceftazidime (control - dark blue) is lower than in K279a, but this is not reduced by  
451 the presence of 1  $\mu\text{g.mL}^{-1}$  ceftazidime (CAZ1 - light blue). **(B)** Growth curves in NB in the  
452 absence of ceftazidime (K279a, control - red and M1, control - dark blue) are not  
453 dramatically altered in the presence of ceftazidime at 1  $\mu\text{g.mL}^{-1}$  (K279, CAZ1 - pink and M1  
454 CAZ1 - light blue) over a 73 cycle (12h) incubation period. Each curve plots mean data for  
455 three biological replicates with, in **B**, four technical replicates for each biological replicate.  
456 Error bars represent standard error of the mean.

457 **Figures**

458

459 **Figure 1**

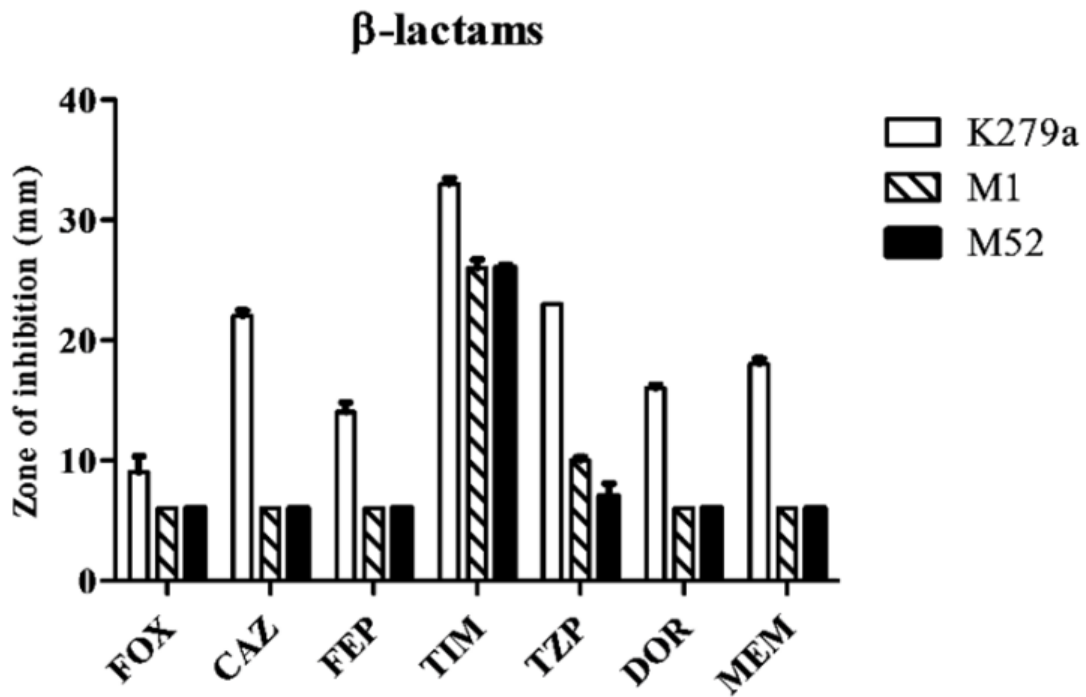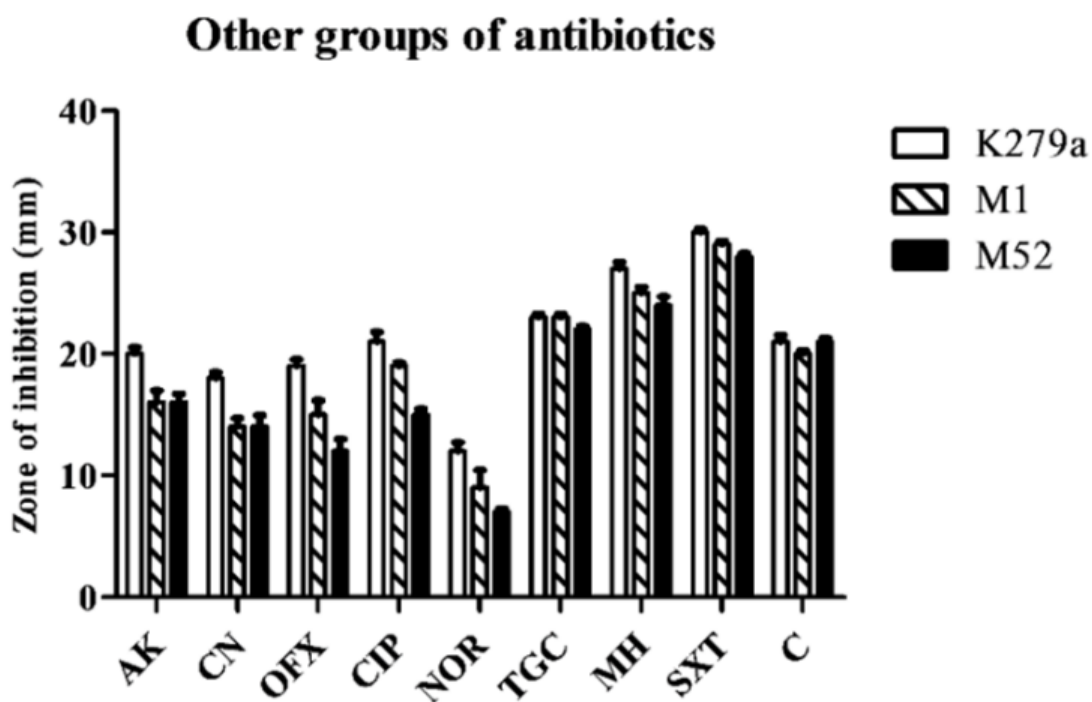

460

461 **Figure 2**

462

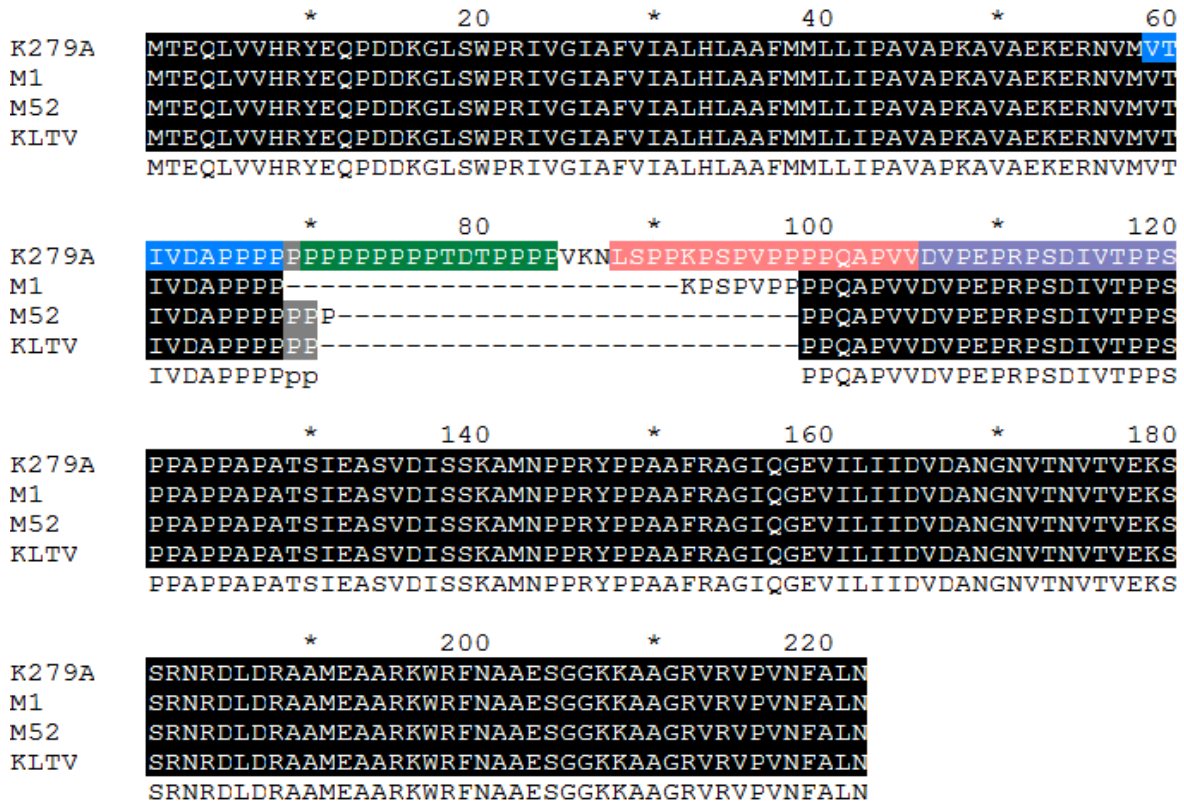

463

464

465

466

467

468

469

470

471

472

473 **Figure 3**

474 **A**

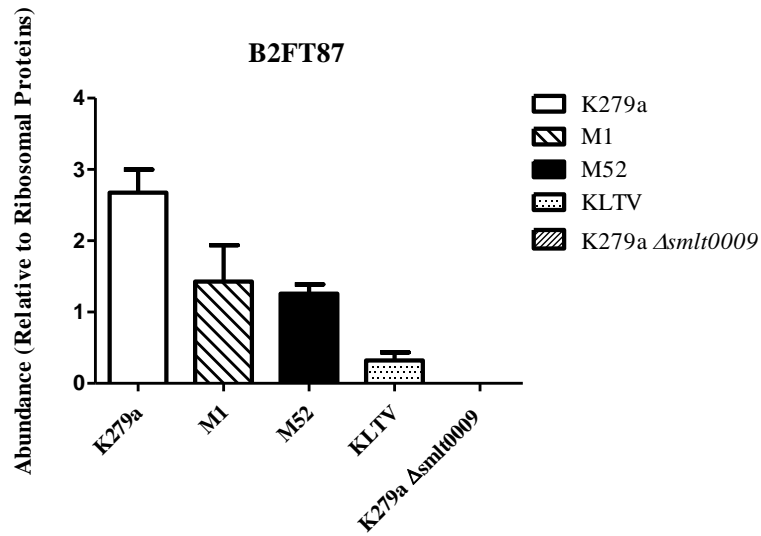

475

476 **B**

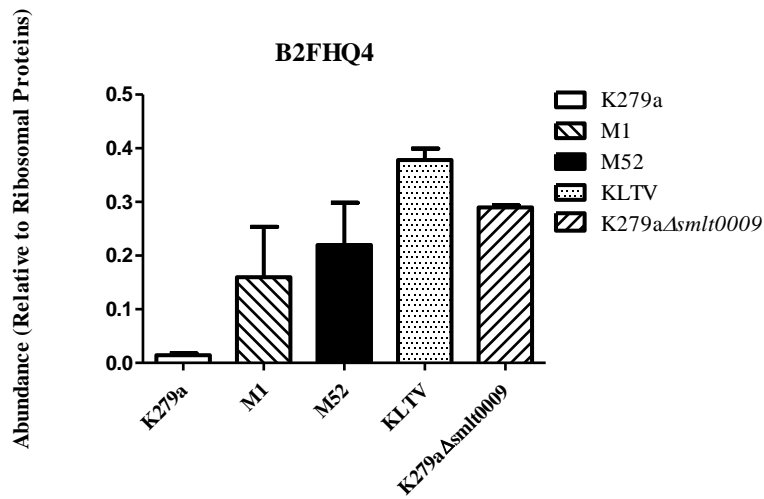

477

478 **C**

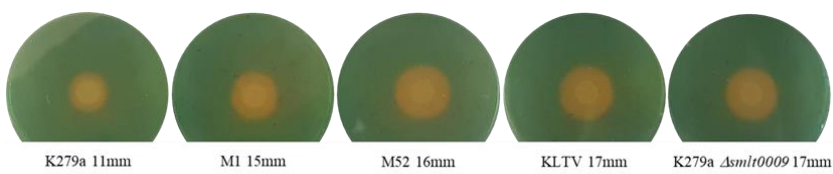

479

480

481 **Figure 4**

482 **A**

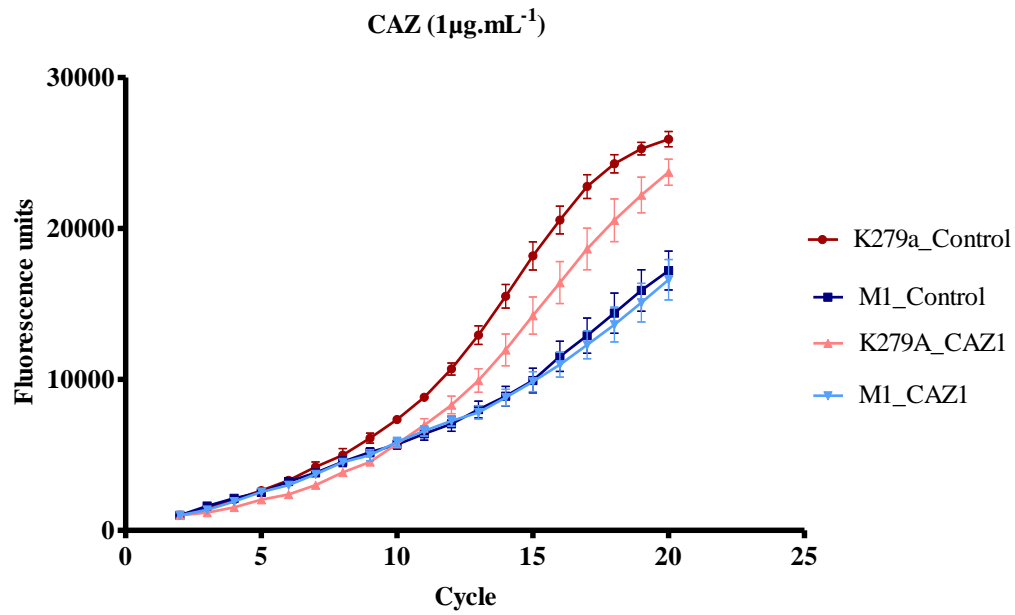

483

484 **B**

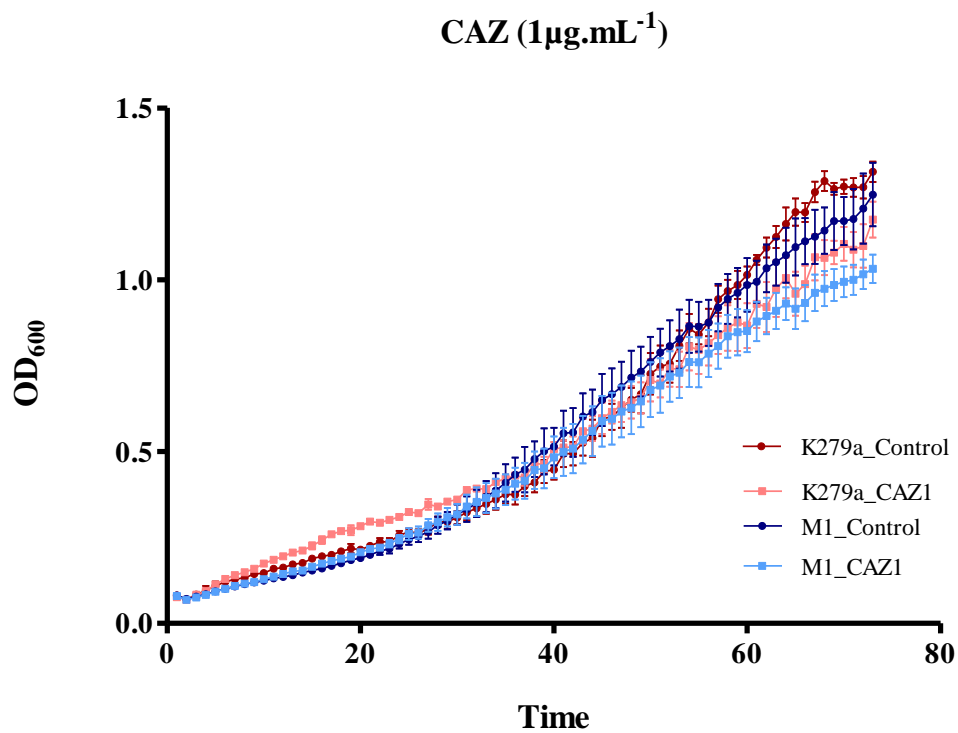

485

486



## 487 **References**

488 Alexeyev, M.F., (1999) The pKNOCK series of broad-host-range mobilizable suicide vectors  
489 for gene knockout and targeted DNA insertion into the chromosome of gram-negative  
490 bacteria. *BioTechniques* 26: 824-826, 828.

491 Avison, M.B., C.J. von Heldreich, C.S. Higgins, P.M. Bennett & T.R. Walsh, (2000) A TEM-2  
492 beta-lactamase encoded on an active Tn1-like transposon in the genome of a clinical isolate  
493 of *Stenotrophomonas maltophilia*. *J Antimicrob Chemoth* 46: 879-884.

494 Bolger, A.M., M. Lohse & B. Usadel, (2014) Trimmomatic: a flexible trimmer for Illumina  
495 sequence data. *Bioinformatics* 30: 2114-2120.

496 Calvopina, K. & M.B. Avison, (2018) Disruption of *mpl* Activates beta-Lactamase Production  
497 in *Stenotrophomonas maltophilia* and *Pseudomonas aeruginosa* Clinical Isolates. *Antimicrob*  
498 *Agents Ch* 62.

499 Calvopina, K., P. Hinchliffe, J. Brem, K.J. Heesom, S. Johnson, R. Cain, C.T. Lohans,  
500 C.W.G. Fishwick, C.J. Schofield, J. Spencer & M.B. Avison, (2017) Structural/mechanistic  
501 insights into the efficacy of nonclassical beta-lactamase inhibitors against extensively drug  
502 resistant *Stenotrophomonas maltophilia* clinical isolates. *Mol Microbiol* 106: 492-504.

503 Calvopina, K., K.D. Umland, A.M. Rydzik, P. Hinchliffe, J. Brem, J. Spencer, C.J. Schofield &  
504 M.B. Avison, (2016) Sideromimic Modification of Lactivicin Dramatically Increases Potency  
505 against Extensively Drug-Resistant *Stenotrophomonas maltophilia* Clinical Isolates.  
506 *Antimicrob Agents Ch* 60: 4170-4175.

507 Castanheira, M., J.C. Mills, D.J. Farrell & R.N. Jones, (2014) Mutation-Driven beta-Lactam  
508 Resistance Mechanisms among Contemporary Ceftazidime-Nonsusceptible *Pseudomonas*  
509 *aeruginosa* Isolates from US Hospitals. *Antimicrob Agents Ch* 58: 6844-6850.

510 Choi, J.J. & M.W. McCarthy, (2018) Cefiderocol: a novel siderophore cephalosporin. *Expert*  
511 *Opin Inv Drug* 27: 193-197.

- 512 CLSI, (2006) Performance Standards for Antimicrobial Disk Suceptibility Tests; Approved  
513 Standard-Ninth Edition. M2-A9.
- 514 CLSI, (2012) Methods for Dilution Antimicrobial Susceptibility Tests for Bacteria That Grow  
515 Aerobically; Approved Standard-Ninth Edition. M07-A9.
- 516 CLSI, (2017) Performance Standards for Antimicrobial Susceptibility Testing. In., pp.
- 517 Coldham, N.G., M. Webber, M.J. Woodward & L.J.V. Piddock, (2010) A 96-well plate  
518 fluorescence assay for assessment of cellular permeability and active efflux in *Salmonella*  
519 *enterica* serovar Typhimurium and *Escherichia coli*. *J Antimicrob Chemoth* 65: 1655-1663.
- 520 Crossman, L.C., V.C. Gould, J.M. Dow, G.S. Vernikos, A. Okazaki, M. Sebahia, D.  
521 Saunders, C. Arrowsmith, T. Carver, N. Peters, E. Adlem, A. Kerhornou, A. Lord, L. Murphy,  
522 K. Seeger, R. Squares, S. Rutter, M.A. Quail, M.A. Rajandream, D. Harris, C. Churcher, S.D.  
523 Bentley, J. Parkhill, N.R. Thomson & M.B. Avison, (2008) The complete genome,  
524 comparative and functional analysis of *Stenotrophomonas maltophilia* reveals an organism  
525 heavily shielded by drug resistance determinants. *Genome Biol* 9.
- 526 Darling, A.E., B. Mau & N.T. Perna, (2010) progressiveMauve: Multiple Genome Alignment  
527 with Gene Gain, Loss and Rearrangement. *Plos One* 5.
- 528 Garcia, C.A., B.P. De Rossi, E. Alcaraz, C. Vay & M. Franco, (2012) Siderophores of  
529 *Stenotrophomonas maltophilia*: detection and determination of their chemical nature. *Rev*  
530 *Argent Microbiol* 44: 150-154.
- 531 Gould, V.C. & M.B. Avison, (2006) SmeDEF-mediated antimicrobial drug resistance in  
532 *Stenotrophomonas maltophilia* clinical isolates having defined phylogenetic relationships. *J*  
533 *Antimicrob Chemoth* 57: 1070-1076.
- 534 Gould, V.C., A. Okazaki & M.B. Avison, (2006) Beta-lactam resistance and beta-lactamase  
535 expression in clinical *Stenotrophomonas maltophilia* isolates having defined phylogenetic  
536 relationships. *The Journal of antimicrobial chemotherapy* 57: 199-203.

- 537 Hassett, D.J., P.A. Sokol, M.L. Howell, J.F. Ma, H.T. Schweizer, U. Ochsner & M.L. Vasil,  
538 (1996) Ferric uptake regulator (Fur) mutants of *Pseudomonas aeruginosa* demonstrate  
539 defective siderophore-mediated iron uptake, altered aerobic growth, and decreased  
540 superoxide dismutase and catalase activities. *J Bacteriol* 178: 3996-4003.
- 541 Klebba, P.E., (2016) ROSET Model of TonB Action in Gram-Negative Bacterial Iron  
542 Acquisition. *J Bacteriol* 198: 1013-1021.
- 543 Kline, T., M. Fromhold, T.E. McKennon, S. Cai, J. Treiberg, N. Ihle, D. Sherman, W.  
544 Schwan, M.J. Hickey, P. Warrener, P.R. Witte, L.L. Brody, L. Goltry, L.M. Barker, S.U.  
545 Anderson, S.K. Tanaka, R.M. Shawar, L.Y. Nguyen, M. Langhorne, A. Bigelow, L.  
546 Embuscado & E. Naeemi, (2000) Antimicrobial effects of novel siderophores linked to beta-  
547 lactam antibiotics. *Bioorgan Med Chem* 8: 73-93.
- 548 Kohler, S.D., A. Weber, S.P. Howard, W. Welte & M. Drescher, (2010) The proline-rich  
549 domain of TonB possesses an extended polyproline II-like conformation of sufficient length  
550 to span the periplasm of Gram-negative bacteria. *Protein Sci* 19: 625-630.
- 551 Livermore, D.M., (1987) Mechanisms of Resistance to Cephalosporin Antibiotics. *Drugs* 34:  
552 64-88.
- 553 Moynie, L., A. Luscher, D. Rolo, D. Pletzer, A. Tortajada, H. Weingart, Y. Braun, M.G.P.  
554 Page, J.H. Naismith & T. Kohler, (2017) Structure and Function of the PiuA and PirA  
555 Siderophore-Drug Receptors from *Pseudomonas aeruginosa* and *Acinetobacter baumannii*.  
556 *Antimicrob Agents Ch* 61.
- 557 Nas, M.Y. & N.P. Cianciotto, (2017) *Stenotrophomonas maltophilia* produces an EntC-  
558 dependent catecholate siderophore that is distinct from enterobactin. *Microbiol-Sgm* 163:  
559 1590-1603.

- 560 Okazaki, A. & M.B. Avison, (2008) Induction of L1 and L2 beta-lactamase production in  
561 *Stenotrophomonas maltophilia* is dependent on an AmpR-type regulator. *Antimicrob Agents*  
562 *Ch 52: 1525-1528.*
- 563 Pfeifer, Y., A. Cullik & W. Witte, (2010) Resistance to cephalosporins and carbapenems in  
564 Gram-negative bacterial pathogens. *Int J Med Microbiol 300: 371-379.*
- 565 Sanchez, M.B., (2015) Antibiotic resistance in the opportunistic pathogen *Stenotrophomonas*  
566 *maltophilia*. *Front Microbiol 6.*
- 567 Schauer, K., D.A. Rodionov & H. de Reuse, (2008) New substrates for TonB-dependent  
568 transport: do we only see the 'tip of the iceberg'? *Trends Biochem Sci 33: 330-338.*
- 569 Silva, J.C., M.V. Gorenstein, G.Z. Li, J.P.C. Vissers & S.J. Geromanos, (2006) Absolute  
570 quantification of proteins by LCMSE - A virtue of parallel MS acquisition. *Mol Cell Proteomics*  
571 *5: 144-156.*
- 572 Starr, J., M.F. Brown, L. Aschenbrenner, N. Caspers, Y. Che, B.S. Gerstenberger, M.  
573 Huband, J.D. Knafels, M.M. Lemmon, C. Li, S.P. McCurdy, E. McElroy, M.R. Rauckhorst,  
574 A.P. Tomaras, J.A. Young, R.P. Zaniewski, V. Shanmugasundaram & S. Han, (2014)  
575 Siderophore Receptor-Mediated Uptake of Lactivicin Analogues in Gram-Negative Bacteria.  
576 *J Med Chem 57: 3845-3855.*
- 577 Talfan, A., O. Mounsey, M. Charman, E. Townsend & M.B. Avison, (2013) Involvement of  
578 Mutation in *ampD I*, *mrcA*, and at Least One Additional Gene in beta-Lactamase  
579 Hyperproduction in *Stenotrophomonas maltophilia*. *Antimicrob Agents Ch 57: 5486-5491.*
- 580 Toleman, M.A., P.M. Bennett, D.M.C. Bennett, R.N. Jones & T.R. Walsh, (2007) Global  
581 emergence of trimethoprim/sulfamethoxazole resistance in *Stenotrophomonas maltophilia*  
582 mediated by acquisition of *sul* genes. *Emerg Infect Dis 13: 559-565.*
- 583 Tomaras, A.P., J.L. Crandon, C.J. McPherson, M.A. Banevicius, S.M. Finegan, R.L. Irvine,  
584 M.F. Brown, J.P. O'Donnell & D.P. Nicolau, (2013) Adaptation-Based Resistance to

- 585 Siderophore-Conjugated Antibacterial Agents by *Pseudomonas aeruginosa*. *Antimicrob*  
586 *Agents* Ch 57: 4197-4207.
- 587 Wilson, B.R., A.R. Bogdan, M. Miyazawa, K. Hashimoto & Y. Tsuji, (2016) Siderophores in  
588 Iron Metabolism: From Mechanism to Therapy Potential. *Trends Mol Med* 22: 1077-1090.
- 589
